# Supplementary material
Source: PubMed Central journal article supplement (PMC10959521)
Supplement: NIHMS1944328-supplement-1.pdf [file NIHMS1944328-supplement-1.pdf]

## Supplemental Figure 1

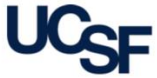

University of California  
San Francisco

### Imagine what cancer research will look like in 2030.

What areas will the HDFCCC need to prioritize to be at the forefront?

What innovations and technologies will get us there?

What are we already doing? What do we need to be doing?

The HDFCCC wants to visit these questions over the course of several "visioning" symposia and other events. Your input is requested to identify themes – areas that have a robust research presence and areas that are still emerging.

Please respond by **August 29, 2018**.

What themes will galvanize innovative translational research? For example, drug resistance, microbiome, pathogen-associated malignancies, imaging and theranostics, survivorship, environmental health, etc. Think outside the box, within or outside of current HDFCCC organization, and across basic, clinical, and population sciences.

Theme

Is this an area you are actively pursuing in your own research?

Could you champion this topic at a symposium or other event? If so, provide your name.

Would you like to enter another theme?

Yes

No

**Supplementary Figure 1: Member survey.** The member survey, distributed via Qualtrics, asked members to predict what themes will galvanize translational research in the year 2030. Members were able to provide multiple responses to the same question.
